# Supplementary material for: Genetic and epigenetic characterization of hypodiploid acute lymphoblastic leukemia
Source: PubMed Central journal article supplement (PMC4767471; doi:10.18632/oncotarget.6000), 2015-10-30
Supplement: oncotarget-06-42793-s001.pdf [file oncotarget-06-42793-s001.pdf]

SUPPLEMENTARY FIGURES AND TABLES

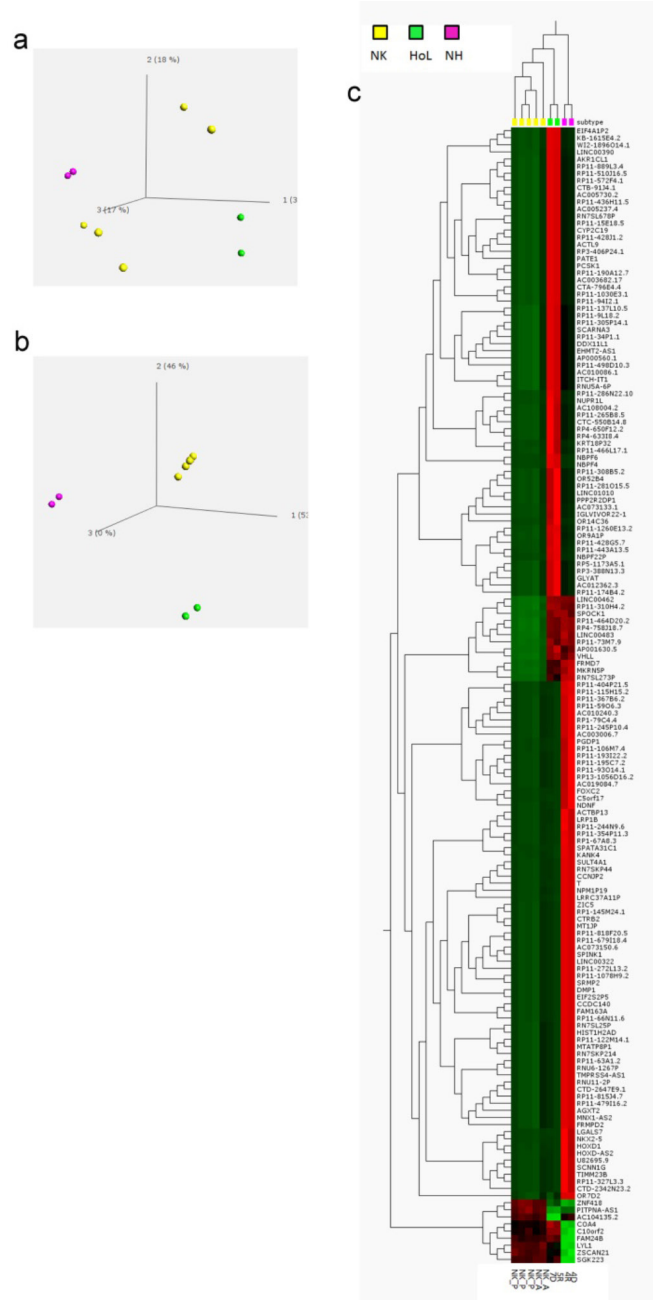

**Supplementary Figure S1: A.** Unsupervised principal component analysis (PCA) of gene expression data from 4 hypodiploid samples, including five normal karyotype controls. **B.** Supervised PCA of gene expression data from 4 hypodiploid samples, including five normal karyotype controls. **C.** Hierarchical clustering analysis performed using the 160 most variable probe sets (FDR = 0.01).

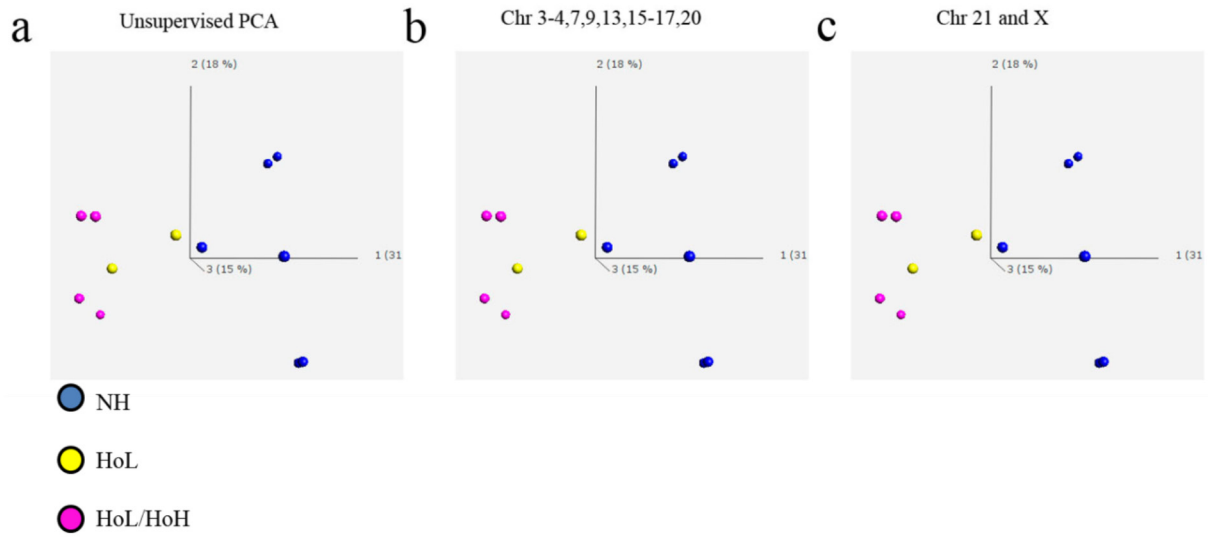

**Supplementary Figure S2: A.** Unsupervised principal component analysis (PCA) plot of methylation array data from 9 hypodiploid cases. Near-haploid, HoL and HoL/HoH cases form clusters by PCA. **B.** When restricting the analysis to commonly lost chromosomes **C.** or only chromosome 21 and X, retained in both copies in all cases.

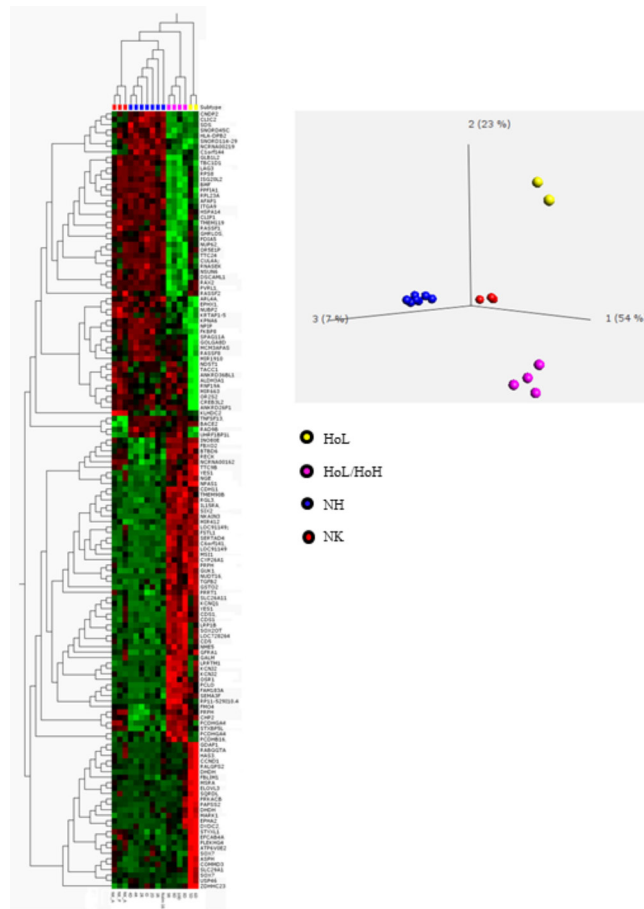

**Supplementary Figure S3:** **A.** Hierarchical clustering analysis performed using the 143 most variable probe sets. **B.** Multigroup supervised principal component analysis (PCA) of methylation array data from 9 hypodiploid cases, including a near-haploid cell line, Nalm16 and three normal karyotype controls (FDR = 0.1).

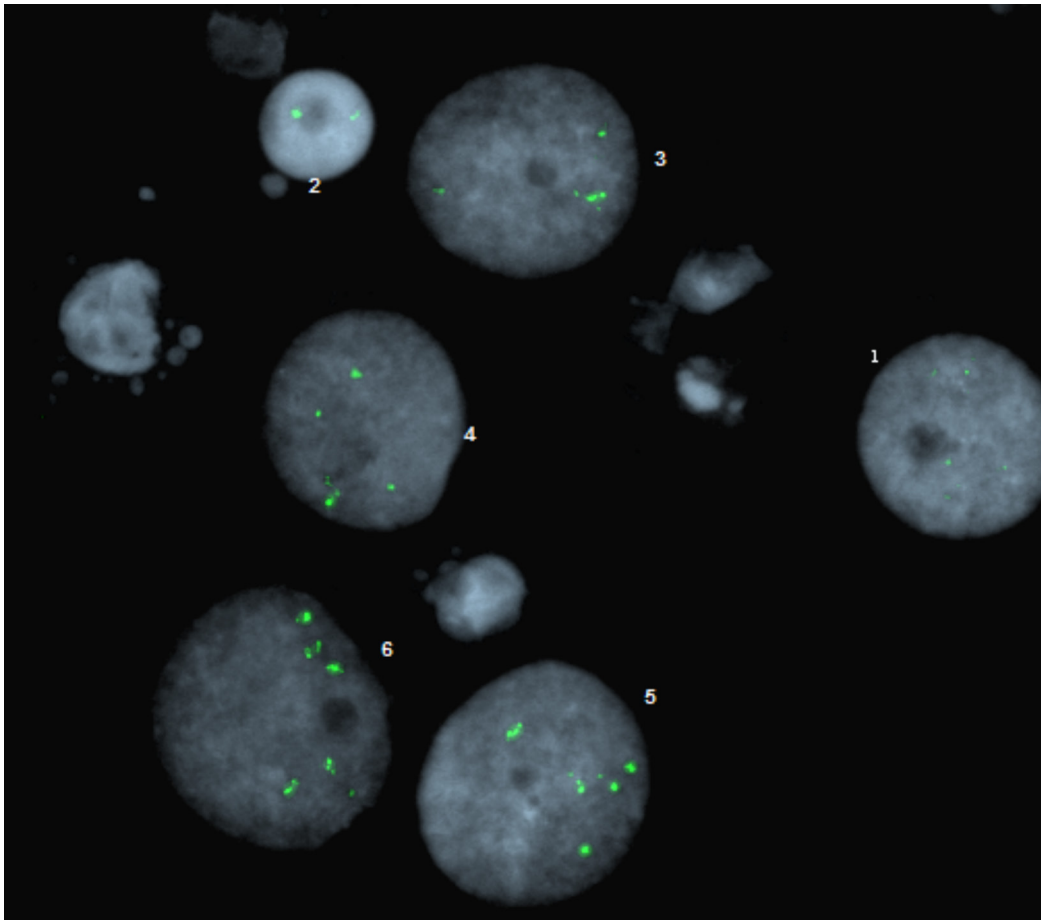

Supplementary Figure S4: Interphase FISH on case 10, showing four or five copies of chromosome 21 in a majority of cells.

**Supplementary Table S1: Single nucleotide polymorphism array analysis results for hypodiploid acute lymphoblastic leukemia**

**Supplementary Table S2: Exome sequencing analyses results on 10 hypodiploid cases**

Supplementary Table S3: TP53 mutations in HoL and HoL/HoH ALL

| Case No. | Subtype | Gene | Chr | Function              | Exonic Biotype | MAF (%) | Cosmic          | Condel             | Start   | End     | Ref | Obs |
|----------|---------|------|-----|-----------------------|----------------|---------|-----------------|--------------------|---------|---------|-----|-----|
| 5D       | HoL     | TP53 | 17  | SPLICE_SITE_ACCEPTOR  |                | 14      | COSM984869(1)   |                    | 7574034 | 7574034 | C   | G   |
| 6D       | HoL     | TP53 | 17  | NON_SYNONYMOUS_CODING | MISSENSE       | 69      | COSM1636702(5)  | 0.889, deleterious | 7577094 | 7577094 | G   | A   |
| 8D       | HoL/HoH | TP53 | 17  | NON_SYNONYMOUS_CODING | MISSENSE       | 85      | COSM99022(89)   | 0.925, deleterious | 7578406 | 7578406 | C   | T   |
| 9D       | HoL/HoH | TP53 | 17  | NON_SYNONYMOUS_CODING | MISSENSE       | 68      | COSM99718(31)   | 0.880, deleterious | 7578190 | 7578190 | T   | C   |
| 9R       | HoL/HoH | TP53 | 17  | NON_SYNONYMOUS_CODING | MISSENSE       | 82      | COSM99718(31)   | 0.880, deleterious | 7578190 | 7578190 | T   | C   |
| 10D      | HoL/HoH | TP53 | 17  | NON_SYNONYMOUS_CODING | MISSENSE       | 89      | COSM1640833(16) | 0.840, deleterious | 7577548 | 7577548 | C   | T   |

Chr – chromosome, D - diagnostic sample, HoH - high hypodiploid ALL, HoL- low hypodiploid ALL, MAF- mutant allele frequency.

**Supplementary Table S4: FISH array analysis results on HoL/HoH ALL**

| Case no | Chr | 1c   | 2c   | 3c   | 4c   | 5c   | 6c | SNP BAF                                                                |
|---------|-----|------|------|------|------|------|----|------------------------------------------------------------------------|
| 8D      | 1   | 0.5% | 9.7% | 13%  | 75%  | 1.5% | –  | 0.5 (or tetrasomy)                                                     |
| 8D      | 2   | –    | 11%  | 55%  | 33%  | –    | –  | Split BAF indicating subclones with more than two copies of chromosome |
| 8D      | 3   | 1.3% | 18%  | 80%  | –    | –    | –  | Complete LOH                                                           |
| 8D      | 4   | 2.2% | 15%  | 82%  | 1.1% | –    | –  | Complete LOH                                                           |
| 8D      | 5   | 2.0% | 9.0% | 89%  | –    | –    | –  | Complete LOH                                                           |
| 8D      | 6   | –    | 6.0% | 4.0% | 17%  | 73%  | –  | Split BAF indicating subclones with more than two copies of chromosome |
| 8D      | 7   | 1.5% | 17%  | 82%  | –    | –    | –  | Complete LOH                                                           |
| 8D      | 8   | –    | 9.0% | 11%  | 79%  | 1.0% | –  | 0.5 (or tetrasomy)                                                     |
| 8D      | 9   | 2.0% | 96%  | 3.0% | 2.0% | –    | –  | Complete LOH                                                           |
| 8D      | 10  | –    | 9.2% | 2.4% | 29%  | 59%  | –  | Split BAF indicating subclones with more than two copies of chromosome |
| 8D      | 11  | 1.0% | 17%  | 1.0% | 80%  | 1.0% | –  | 0.5 (or tetrasomy)                                                     |
| 8D      | 12  | 0.5% | 17%  | 15%  | 67%  | –    | –  | 0.5 (or tetrasomy)                                                     |
| 8D      | 13  | 1.3% | 21%  | 78%  | –    | –    | –  | Complete LOH                                                           |
| 8D      | 14  | –    | 6.0% | 4.0% | 31%  | 59%  | –  | Split BAF indicating subclones with more than two copies of chromosome |
| 8D      | 15  | 12%  | 87%  | –    | 0.9% | –    | –  | Complete LOH                                                           |
| 8D      | 16  | 2.2% | 22%  | 75%  | 0.5% | –    | –  | Complete LOH                                                           |
| 8D      | 17  | 9.6% | 88%  | 2.4% | 6.0% | –    | –  | Complete LOH                                                           |
| 8D      | 18  | –    | 2.0% | 4.0% | 69%  | 25%  | –  | Split BAF indicating subclones with more than two copies of chromosome |
| 8D      | 19p | 7.0% | 51%  | 31%  | 11%  | –    | –  | 0.5 (or tetrasomy)                                                     |
| 8D      | 19q | 22%  | 39%  | 17%  | 22%  | –    | –  | 0.5 (or tetrasomy)                                                     |
| 8D      | 20  | 0.6% | 15%  | 78%  | 6.0% | –    | –  | Complete LOH                                                           |
| 8D      | 21  | –    | 8.0% | 3.0% | 38%  | 51%  | –  | Split BAF indicating subclones with more than two copies of chromosome |
| 8D      | 22  | 1.0% | 5.0% | 28%  | 66%  | –    | –  | Split BAF indicating subclones with more than two copies of chromosome |
| 8D      | X/X | 3.0% | 23%  | 31%  | 43%  | –    | –  | 0.5 (or tetrasomy)                                                     |
| 8D      | 5   | 14%  | 67%  | 7.0% | 7.0% | 4.0% | –  | Complete LOH                                                           |
| 9R      | 17  | 12%  | 72%  | 14%  | 2.0% | –    | –  | Complete LOH                                                           |
| 9R      | 18  | 7.0% | 57%  | 23%  | 11%  | 3.0% | –  | Split BAF indicating subclones with more than two copies of chromosome |
| 9R      | 19  | 20%  | 66%  | 7.0% | 4.0% | 3.0% | –  | Split BAF indicating subclones with more than two copies of chromosome |

(Continued)

| Case no | Chr | 1c   | 2c   | 3c   | 4c   | 5c   | 6c   | SNP BAF                                                                |
|---------|-----|------|------|------|------|------|------|------------------------------------------------------------------------|
| 10D     | 1   | 1.5% | 3.6% | 7.7% | 82%  | 5.1% | –    | 0.5 (or tetrasomy)                                                     |
| 10D     | 2   | 2.2% | 12%  | 5.3% | 79%  | 1.7% | –    | 0.5 (or tetrasomy)                                                     |
| 10D     | 3   | –    | 23%  | 75%  | 2.0% | –    | –    | Complete LOH                                                           |
| 10D     | 4   | –    | 9.0% | 88%  | 3.0% | –    | –    | Complete LOH                                                           |
| 10D     | 5   | 3.0% | 33%  | 63%  | 1.0% | –    | –    | Clear Split BAF indicating trisomy                                     |
| 10D     | 6   | –    | 8.0% | 7.0% | 49%  | 36%  | 1.4% | Split BAF indicating subclones with more than two copies of chromosome |
| 10D     | 7   | 8.7% | 90%  | 1.7% | –    | –    | –    | Complete LOH                                                           |
| 10D     | 8   | –    | 1.6% | 45%  | 55%  | –    | –    | Complete LOH                                                           |
| 10D     | 9   | 6.3% | 93%  | –    | 0.5% | –    | –    | Complete LOH                                                           |
| 10D     | 10  | –    | 10%  | 2.8% | 32%  | 55%  | –    | Split BAF indicating subclones with more than two copies of chromosome |
| 10D     | 11  | –    | 5.0% | 18%  | 75%  | 1.0% | 1.0% | 0.5 (or tetrasomy)                                                     |
| 10D     | 12  | 0.6% | 13%  | 5.0% | 82%  | –    | –    | 0.5 (or tetrasomy)                                                     |
| 10D     | 13  | 6.0% | 91%  | 3.0% | –    | –    | –    | Complete LOH                                                           |
| 10D     | 14  | 17%  | 44%  | 39%  | –    | –    | –    | Complete LOH                                                           |
| 10D     | 15  | 15%  | 42%  | 43%  | –    | –    | –    | Complete LOH                                                           |
| 10D     | 16  | 7.4% | 90%  | 2.5% | –    | –    | –    | Complete LOH                                                           |
| 10D     | 17  | –    | 1.3% | 6.3% | 75%  | 17%  | –    | Complete LOH                                                           |
| 10D     | 18  | –    | 4.3% | 9.4% | 39%  | 48%  | –    | Split BAF indicating subclones with more than two copies of chromosome |
| 10D     | 19  | –    | 5.0% | 21%  | 74%  | –    | –    | 0.5 (or tetrasomy)                                                     |
| 10D     | 20  | 1.0% | 15%  | 83%  | 1.0% | –    | –    | Complete LOH                                                           |
| 10D     | 21  | –    | 7.0% | 10%  | 47%  | 34%  | 2.0% | Split BAF indicating subclones with more than two copies of chromosome |
| 10D     | 22  | 1.0% | 18%  | 78%  | 3.0% | –    | –    | Complete LOH                                                           |
| 10D     | X/Y | 1.0% | 11%  | 14%  | 69%  | 5.0% | –    | 0.5 (or tetrasomy)                                                     |

BAF - B allele frequency, c - copy number, D - diagnostic sample, LOH - loss of heterozygosity, R- relapse sample, SNP - single nucleotide polymorphism.



**Supplementary Table S5: Primers used for gene fusion verification**

| Case        | Gene                  | Primer                   | Sequence              |                       |
|-------------|-----------------------|--------------------------|-----------------------|-----------------------|
| 4D (NH)     | <i>N4BP2L1</i>        | <i>N4BP2L1_1</i> Forward | ACATGGCCGGAGAGTCACAA  |                       |
|             |                       | <i>N4BP2L1_2</i> Forward | ATGGCCGGAGAGTCACAAAAA |                       |
|             | <i>HMGB1</i>          | <i>HMGB1_1</i> Reverse   | TTGGGTGCATTGGGATCCTT  |                       |
|             |                       | <i>HMGB1_2</i> Reverse   | GCAGACATGGTCTTCCACCT  |                       |
|             | <i>TPM4</i>           | <i>TPM4_1</i> Forward    | GAGGCGGTGAAACGCAAGAT  |                       |
|             |                       | <i>TPM4_2</i> Forward    | CGGTGAAACGCAAGATCCA   |                       |
| <i>KLF2</i> | <i>KLF2_1</i> Reverse | GAAGGCACGATCGCACAGAT     |                       |                       |
|             | <i>KLF2_2</i> Reverse | GAGAAGGCACGATCGCACAG     |                       |                       |
| 4R          | <i>ZEB2</i>           | <i>ZEB2_1</i> Forward    | TTTTCTCCCCCACTTCGC    |                       |
|             |                       | <i>ZEB2_2</i> Forward    | GAGGCGTAACACGTCAGTCC  |                       |
|             | <i>CXCR4</i>          | <i>CXCR4_1</i> Reverse   | CCATTGCCACAATGCCAG    |                       |
|             |                       | <i>CXCR4_2</i> Reverse   | ACGGAAACAGGGTTCCTTCAT |                       |
|             | <i>B2M</i>            | <i>B2M_1</i> Forward     | TGCTCGCGCTACTCTCTTT   |                       |
|             |                       | <i>B2M_2</i> Forward     | CGAGATGTCTCGTCCGTG    |                       |
|             | <i>KLC1</i>           | <i>KLC1_1</i> Reverse    | TCCTATGCACACAGACGCAG  |                       |
|             |                       | <i>KLC1_2</i> Reverse    | ACGTTATCGCACACAACGTG  |                       |
|             | 7D (HoL)              | <i>PIM3</i>              | <i>PIM3_1</i> Forward | CATCGACTTCGGTTCGGGTG  |
|             |                       |                          | <i>PIM3_2</i> Forward | ACCGCGACATTAAGGACGAA  |
|             |                       | <i>SCO2</i>              | <i>SCO2_1</i> Reverse | GGCTTCTGTTTCGCTTTTGCT |
|             |                       |                          | <i>SCO2_2</i> Reverse | CTGAGAGAGCCTGTGCCAAG  |

NH – near-haploid, HoL – low hypodiploid.
